# Supplementary material
Source: PubMed Central journal article supplement (PMC2899939)
Supplement: pp.109.152488_1.pdf [file pp.109.152488_1.pdf]

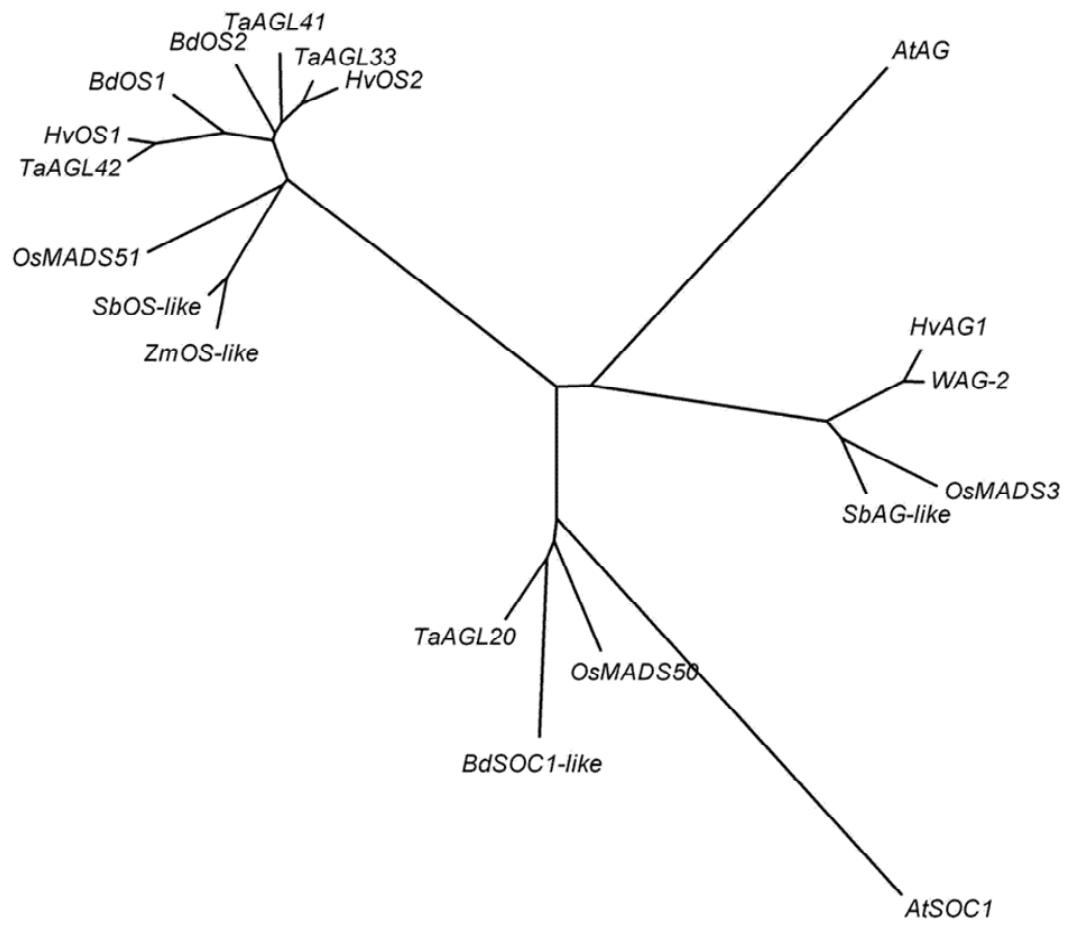

**Supplemental Figure S1.** Phylogenetic relationships between *ODDSOC-like* genes and other plant MADS box genes. The sequence alignment used to create this tree is provided in Supplemental Fig. S2C.

A

MADS Domain

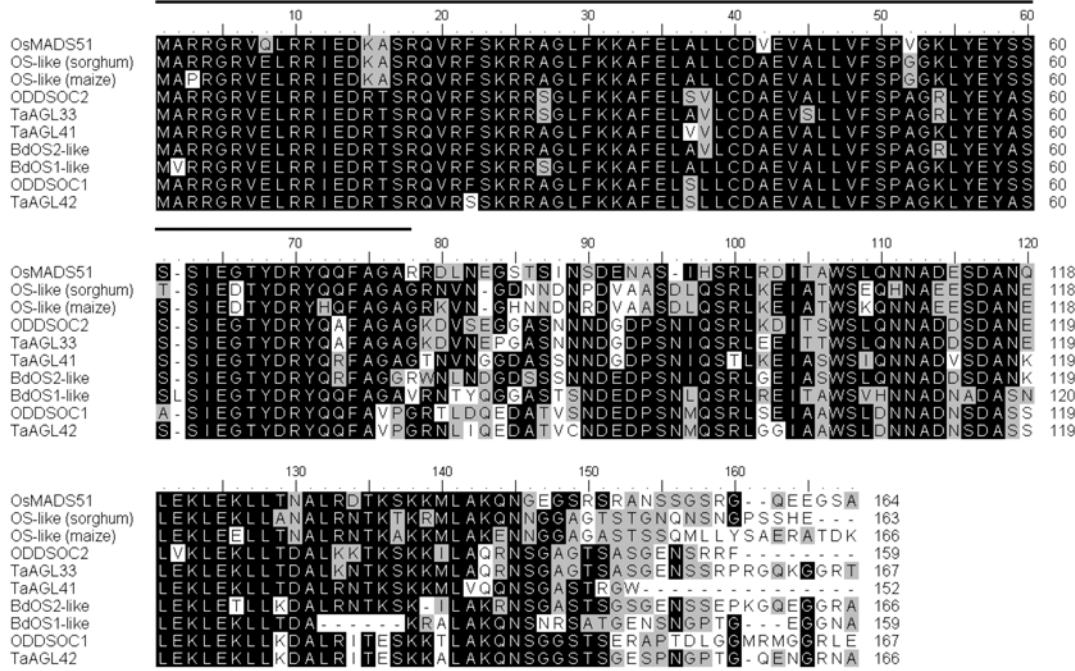

**B**

|                   |                                                                |     |     |     |     |     |     |
|-------------------|----------------------------------------------------------------|-----|-----|-----|-----|-----|-----|
|                   | 10                                                             | 20  | 30  | 40  | 50  | 60  |     |
| <i>OsMADS51</i>   | ATGGCGCGGAGGGGGAAGTGCAGCTGAGGCGGATCGAGGACAAGGCGAGCCGGCAGGTG    |     |     |     |     |     | 60  |
| <i>SbOS-like</i>  | ATGGCGCGGCGCGGGGCGGTGGAGCTCGGGCGGATCGAGGACAAGGCGAGCCGACAGGTG   |     |     |     |     |     | 60  |
| <i>ZmOS-like</i>  | ATGGCAACCGCGCGGGGCGGTGGAGCTCGGGCGGATCGAGGACAAGGCGAGCCGGCAGGTG  |     |     |     |     |     | 60  |
| <i>BdOS2-like</i> | ATGGCGCGGCGCGGGGCGGTGGAGCTCGGGCGGATCGAGGACCGGACGAGCCGGCAGGTG   |     |     |     |     |     | 60  |
| <i>TaAGL41</i>    | ATGGCGCGGCGCGGGGCGGTGGAGCTCGGGCGGATCGAGGACCGGACGAGCCGGCAGGTG   |     |     |     |     |     | 60  |
| <i>ODDSOC2</i>    | ATGGCGCGGCGCGGGGCGGTGGAGCTCGGGCGGATCGAGGACCGGACGAGCCGGCAGGTG   |     |     |     |     |     | 60  |
| <i>TaAGL33</i>    | ATGGCGCGGCGCGGGGCGGTGGAGCTCGGGCGGATCGAGGACCGGACGAGCCGGCAGGTG   |     |     |     |     |     | 60  |
| <i>BdOS1-like</i> | ATGGTTCGGGCGCGGGGCGGTGGAGCTCGGGCGGATCGAGGACCGGACGAGCCGGCAGGTG  |     |     |     |     |     | 60  |
| <i>ODDSOC1</i>    | ATGGCGCGGCGCGGGGCGGTTGAGCTCGGGCGGATCGAGGACCGGACGAGCCGGCAGGTG   |     |     |     |     |     | 60  |
| <i>TaAGL42</i>    | ATGGCGCGGCGCGGGGCGGTTGAGCTCGGGCGGATCGAGGACCGGACGAGCCGGCAGGTG   |     |     |     |     |     | 60  |
|                   | 70                                                             | 80  | 90  | 100 | 110 | 120 |     |
| <i>OsMADS51</i>   | CGGTTCTCCAAGAGGAGCGGGGGCTGTTCAAGAAGGCCTTCGAGCTCGCCCTGCTCTGC    |     |     |     |     |     | 120 |
| <i>SbOS-like</i>  | CGCTTCTCCAAGCGCCGCGGGGGCTGTTCAAGAAGGCCTTCGAGCTGGCCCTGCTCTGC    |     |     |     |     |     | 120 |
| <i>ZmOS-like</i>  | CGCTTCTCCAAGCGCCGCGGGGGCTGTTCAAGAAGGCCTTCGAGCTGGCCCTGCTCTGC    |     |     |     |     |     | 120 |
| <i>BdOS2-like</i> | CGCTTCTCCAAGCGCCGCGGGGGCTTCAAGAAGGCCTTCGAGCTCGCCCTGCTCTGC      |     |     |     |     |     | 120 |
| <i>TaAGL41</i>    | CGATTCTCCAAGCGCCGCGGGGGCTTCAAGAAGGCCTTCGAGCTCGCCCTGCTCTGC      |     |     |     |     |     | 120 |
| <i>ODDSOC2</i>    | CGCTTCTCCAAGCGCCGCTCGGGGGCTTCAAGAAGGCCTTCGAGCTGTGGTCTCTGC      |     |     |     |     |     | 120 |
| <i>TaAGL33</i>    | CGCTTCTCCAAGCGCCGCTCGGGGGCTTCAAGAAGGCCTTCGAGCTCGCCCTGCTCTGC    |     |     |     |     |     | 120 |
| <i>BdOS1-like</i> | CGCTTCTCCAAGCGCCGCTCGGGGGCTTCAAGAAGGCCTTCGAGCTCGCCCTGCTCTGC    |     |     |     |     |     | 120 |
| <i>ODDSOC1</i>    | CGCTTCTCCAAGCGCCGCGGGGGCTTCAAGAAGGCCTTCGAGCTCTCGCTCTCTGC       |     |     |     |     |     | 120 |
| <i>TaAGL42</i>    | CGCTTCTCCAAGCGCCGCGGGGGCTTCAAGAAGGCCTTCGAGCTCTCGCTCTCTGC       |     |     |     |     |     | 120 |
|                   | 130                                                            | 140 | 150 | 160 | 170 | 180 |     |
| <i>OsMADS51</i>   | GACGTGGAGGTGGCGCTCTCGTCTTCTCCCGGTCGGCAAGCTCTACGAGTACTCTCC      |     |     |     |     |     | 180 |
| <i>SbOS-like</i>  | GACGCCGAGGTGCGGCTCTCGTCTTCTCCCGGTCGGCAAGCTCTACGAGTACTCTCC      |     |     |     |     |     | 180 |
| <i>ZmOS-like</i>  | GACGCCGAGGTGCGGCTCTCGTCTTCTCCCGGTCGGCAAGCTCTACGAGTACTCTCC      |     |     |     |     |     | 180 |
| <i>BdOS2-like</i> | GACGCCGAGGTGCGGCTCTCGTCTTCTCCCGGTCGGCAAGCTCTACGAGTACTCTCC      |     |     |     |     |     | 180 |
| <i>TaAGL41</i>    | GACGCCGAGGTGCGGCTCTCGTCTTCTCCCGGTCGGCAAGCTCTACGAGTACTCTCC      |     |     |     |     |     | 180 |
| <i>ODDSOC2</i>    | GACGCCGAGGTGCGGCTCTCGTCTTCTCCCGGTCGGCAAGCTCTACGAGTACTCTCC      |     |     |     |     |     | 180 |
| <i>TaAGL33</i>    | GACGCCGAGGTGCGGCTCTCGTCTTCTCCCGGTCGGCAAGCTCTACGAGTACTCTCC      |     |     |     |     |     | 180 |
| <i>BdOS1-like</i> | GACGCCGAGGTGCGGCTCTCGTCTTCTCCCGGTCGGCAAGCTCTACGAGTACTCTCC      |     |     |     |     |     | 180 |
| <i>ODDSOC1</i>    | GACGCCGAGGTGCGGCTCTCGTCTTCTCCCGGTCGGCAAGCTCTACGAGTACTCTCC      |     |     |     |     |     | 180 |
| <i>TaAGL42</i>    | GACGCCGAGGTGCGGCTCTCGTCTTCTCCCGGTCGGCAAGCTCTACGAGTACTCTCC      |     |     |     |     |     | 180 |
|                   | 190                                                            | 200 | 210 | 220 | 230 | 240 |     |
| <i>OsMADS51</i>   | TCCAGCATGAAGGTACATATGACCGCTATCAGCAATTTGCGGGAGCAGGAAGAAAGTG     |     |     |     |     |     | 240 |
| <i>SbOS-like</i>  | TCCAGCATGAAGGTACATATGACCGCTATCAGCAATTTGCGGGAGCAGGAAGAAAGTG     |     |     |     |     |     | 240 |
| <i>ZmOS-like</i>  | TCCAGCATGAAGGTACATATGACCGCTATCAGCAATTTGCGGGAGCAGGAAGAAAGTG     |     |     |     |     |     | 240 |
| <i>BdOS2-like</i> | TCCAGCATGAAGGTACATATGACCGCTATCAGCAATTTGCGGGAGCAGGAAGAAAGTG     |     |     |     |     |     | 240 |
| <i>TaAGL41</i>    | TCCAGCATGAAGGTACATATGACCGCTATCAGCAATTTGCGGGAGCAGGAAGAAAGTG     |     |     |     |     |     | 240 |
| <i>ODDSOC2</i>    | TCCAGCATGAAGGTACATATGACCGCTATCAGCAATTTGCGGGAGCAGGAAGAAAGTG     |     |     |     |     |     | 240 |
| <i>TaAGL33</i>    | TCCAGCATGAAGGTACATATGACCGCTATCAGCAATTTGCGGGAGCAGGAAGAAAGTG     |     |     |     |     |     | 240 |
| <i>BdOS1-like</i> | TCCAGCATGAAGGTACATATGACCGCTATCAGCAATTTGCGGGAGCAGGAAGAAAGTG     |     |     |     |     |     | 240 |
| <i>ODDSOC1</i>    | TCCAGCATGAAGGTACATATGACCGCTATCAGCAATTTGCGGGAGCAGGAAGAAAGTG     |     |     |     |     |     | 240 |
| <i>TaAGL42</i>    | TCCAGCATGAAGGTACATATGACCGCTATCAGCAATTTGCGGGAGCAGGAAGAAAGTG     |     |     |     |     |     | 240 |
|                   | 250                                                            | 260 | 270 | 280 | 290 | 300 |     |
| <i>OsMADS51</i>   | AACGGAAATAACAAGCATCAACAGTGATGAATGCAAGTATACACTCAGGCTTAGGAG      |     |     |     |     |     | 300 |
| <i>SbOS-like</i>  | AATGGAGATAACAACGATAAACCCAGACGATAGCTGCAGATTTACAGTCGAGACTTAGGAG  |     |     |     |     |     | 300 |
| <i>ZmOS-like</i>  | AATGGAAATAACAACGATAAACCCAGGATGATAGCTGCAGATTTACAGTCGAGACTTAGGAG |     |     |     |     |     | 300 |
| <i>BdOS2-like</i> | AATGGAGATTTCAAGTAGCAACAATGATGATGATCCAAACATACAGTCAAGGCTTAGGAG   |     |     |     |     |     | 300 |
| <i>TaAGL41</i>    | AATGGAGATTTCAAGTAGCAACAATGATGATGATCCAAACATACAGTCAAGGCTTAGGAG   |     |     |     |     |     | 300 |
| <i>ODDSOC2</i>    | AATGGAGATTTCAAGTAGCAACAATGATGATGATCCAAACATACAGTCAAGGCTTAGGAG   |     |     |     |     |     | 300 |
| <i>TaAGL33</i>    | AATGGAGATTTCAAGTAGCAACAATGATGATGATCCAAACATACAGTCAAGGCTTAGGAG   |     |     |     |     |     | 300 |
| <i>BdOS1-like</i> | TATGGAGGCGCAAGTACCAACAATGATGATGATCCAAACATACAGTCAAGGCTTAGGAG    |     |     |     |     |     | 300 |
| <i>ODDSOC1</i>    | GATGAAGATTTCAAGTAGCAACAATGATGATGATCCAAACATACAGTCAAGGCTTAGGAG   |     |     |     |     |     | 300 |
| <i>TaAGL42</i>    | ATTGAAGATTTCAAGTAGCAACAATGATGATGATCCAAACATACAGTCAAGGCTTAGGAG   |     |     |     |     |     | 300 |
|                   | 310                                                            | 320 | 330 | 340 | 350 | 360 |     |
| <i>OsMADS51</i>   | ATAACGGCCTGGTCTCTCAAAACAATGCTGACGAGTGGGATGCTAATCAGCTAGAGAAA    |     |     |     |     |     | 360 |
| <i>SbOS-like</i>  | ATCGCAACATGGTCTGAACAACAATGCTGAGGAGTCAGATGCCAATGAACTGAGAGAAA    |     |     |     |     |     | 360 |
| <i>ZmOS-like</i>  | ATCGCAACATGGTCTAAACAACAACAGCTGAGGAGTCAGATGCCAATGAACTGAGAGAAA   |     |     |     |     |     | 360 |
| <i>BdOS2-like</i> | ATTCGCTCCTGGTCTTTCAAAACAATGCTGACGACTCAGATGCTAATGAACTAGAGAAA    |     |     |     |     |     | 360 |
| <i>TaAGL41</i>    | ATTCGCTCCTGGTCTTTCAAAACAATGCTGATGCTCAGATGCTAATGAACTAGAGAAA     |     |     |     |     |     | 360 |
| <i>ODDSOC2</i>    | ATTACTTCTGGTCTTTCAAAACAATGCTGATGACTCAGATGCTAATGAACTGAGAAA      |     |     |     |     |     | 360 |
| <i>TaAGL33</i>    | ATTACTTCTGGTCTTTCAAAACAATGCTGATGACTCAGATGCTAATGAACTAGAGAAA     |     |     |     |     |     | 360 |
| <i>BdOS1-like</i> | ATTACTTCTGGTCTTTCAACAATAATGCTGATGACTCAGATGCCAGTAACTAGAGAAA     |     |     |     |     |     | 360 |
| <i>ODDSOC1</i>    | ATTGCTGCTGGTCTCTGATAAATGCTGACAATCAGATGCCAGTAACTTAGAGAAA        |     |     |     |     |     | 360 |
| <i>TaAGL42</i>    | ATTGCTGCTGGTCTCTGATAAATGCTGACAATCAGATGCCAGTAACTTAGAGAAA        |     |     |     |     |     | 360 |
|                   | 370                                                            | 380 |     |     |     |     |     |
| <i>OsMADS51</i>   | CTGGAGAAACTGCTGACAAAT                                          |     |     |     |     |     | 381 |
| <i>SbOS-like</i>  | CTAGAGAAACTCCTGGCAAT                                           |     |     |     |     |     | 381 |
| <i>ZmOS-like</i>  | CTTGAGAAACTCCTGACAAAT                                          |     |     |     |     |     | 381 |
| <i>BdOS2-like</i> | TTGGAGCAACTCCTCAAAGAT                                          |     |     |     |     |     | 381 |
| <i>TaAGL41</i>    | CTGGAGAAACTCCTGACAGAT                                          |     |     |     |     |     | 381 |
| <i>ODDSOC2</i>    | CTGGAGAAACTATTGACAGAT                                          |     |     |     |     |     | 381 |
| <i>TaAGL33</i>    | CTGGAGAAACTACTGACAGAT                                          |     |     |     |     |     | 381 |
| <i>BdOS1-like</i> | CTGGAGAAACTACTGACAGAT                                          |     |     |     |     |     | 381 |
| <i>ODDSOC1</i>    | CTGGAGAAACTACTAAAGAT                                           |     |     |     |     |     | 381 |
| <i>TaAGL42</i>    | CTGGAGAAACTACTAAAGAT                                           |     |     |     |     |     | 381 |

C

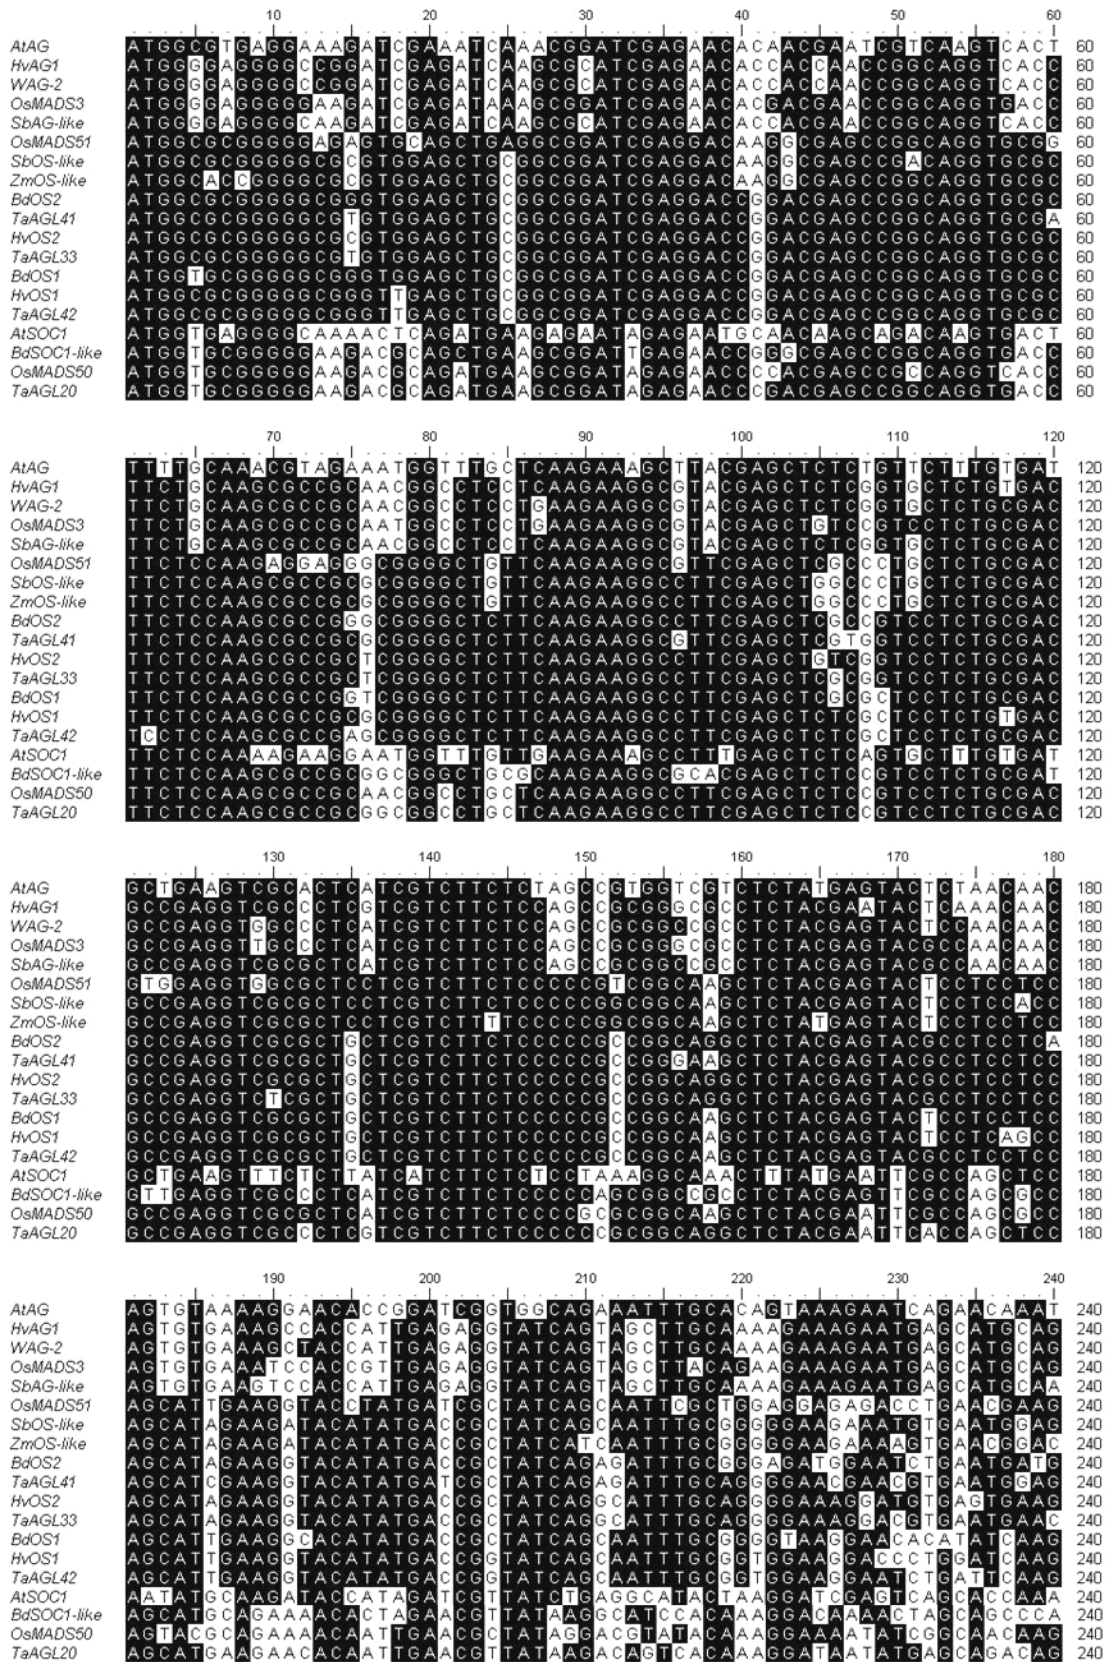

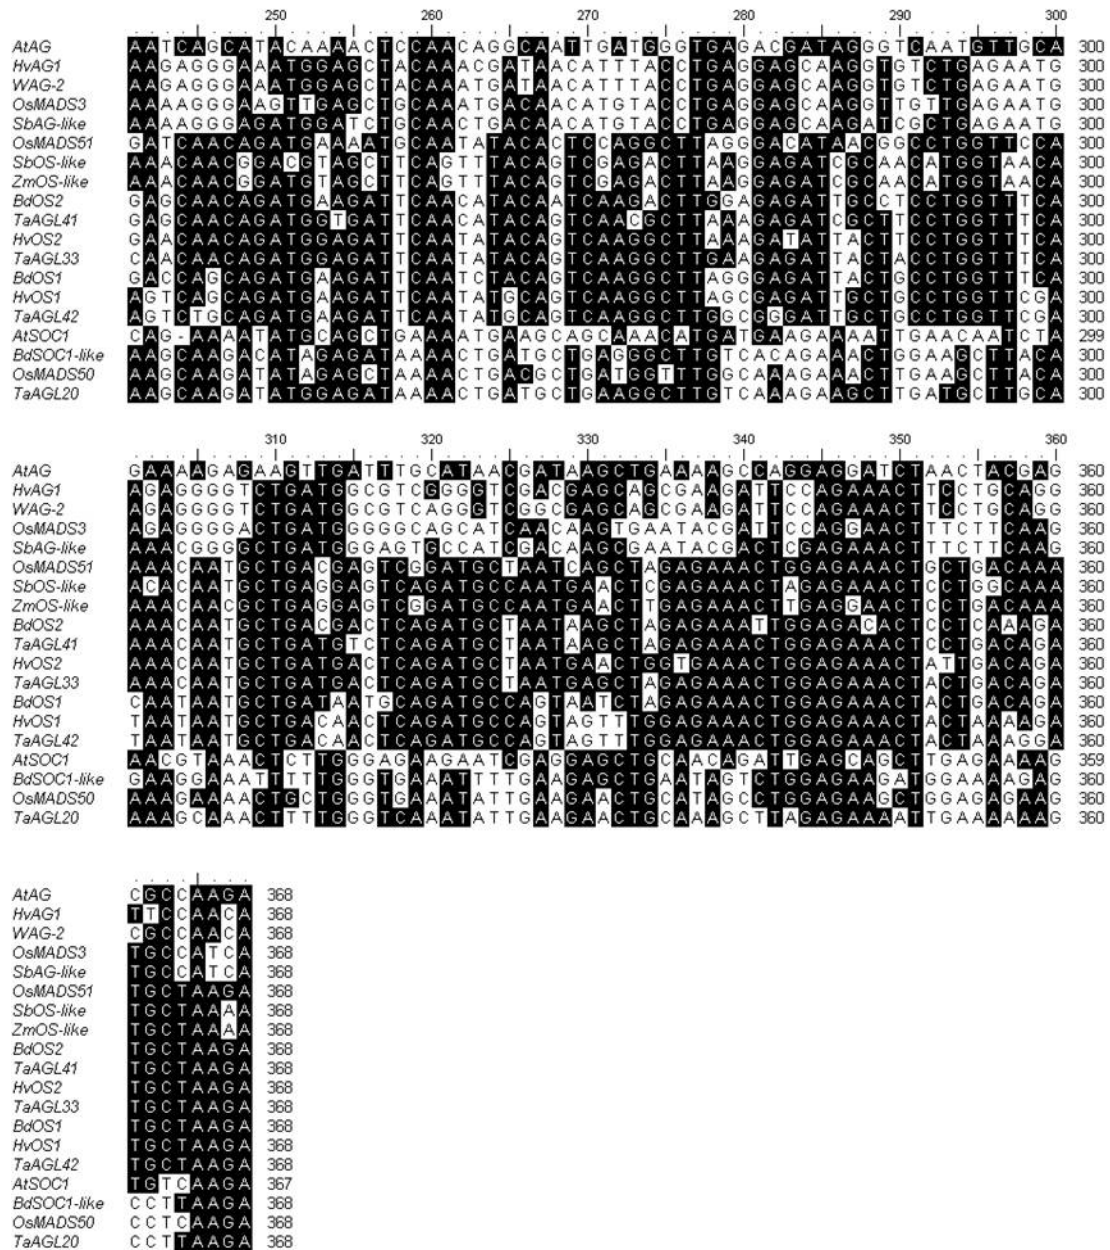

**Supplemental Figure S2.** Alignments of cDNA and predicted protein sequences. A, Alignment of the predicted protein sequences of *ODDSOC-like* genes B, Alignment of cDNA sequences used in constructing phylogeny of *ODDSOC-like* MADS box genes (Fig 1B). C, Alignment of nucleotide sequences used in constructing phylogeny of *ODDSOC-like* MADS box genes with *AGAMOUS-like* genes and *SOC-1-like* genes as out groups (Supplemental Fig. S1). *OsMADS51* (NM\_001051770), *SbOS-like* (XM\_002456815), *ZmOS-like* (NP\_001140218), *BdOS2-like* (Bradi2g59190), *TaAGL41* (DQ512357), *ODDSOC2* (Unigene 5425), *TaAGL33* (DQ512366), *BdOS1-like* (Bradi2g59120), *ODDSOC1* (Unigene 27247), *TaAGL42* (DQ512358), *AtAG*

(NM\_118013), *SbAG-like* (XM\_002454940), *WAG-2* (AB465688), *OsMADS3* (L37528.1), *HvAG-1* (AF486648), *AtSOC1* (NM\_130128), *OsMADS50* (AY332476.1), *BdSOC1-like* (Bradi1g77020), *TaAGL20* (DQ512338).

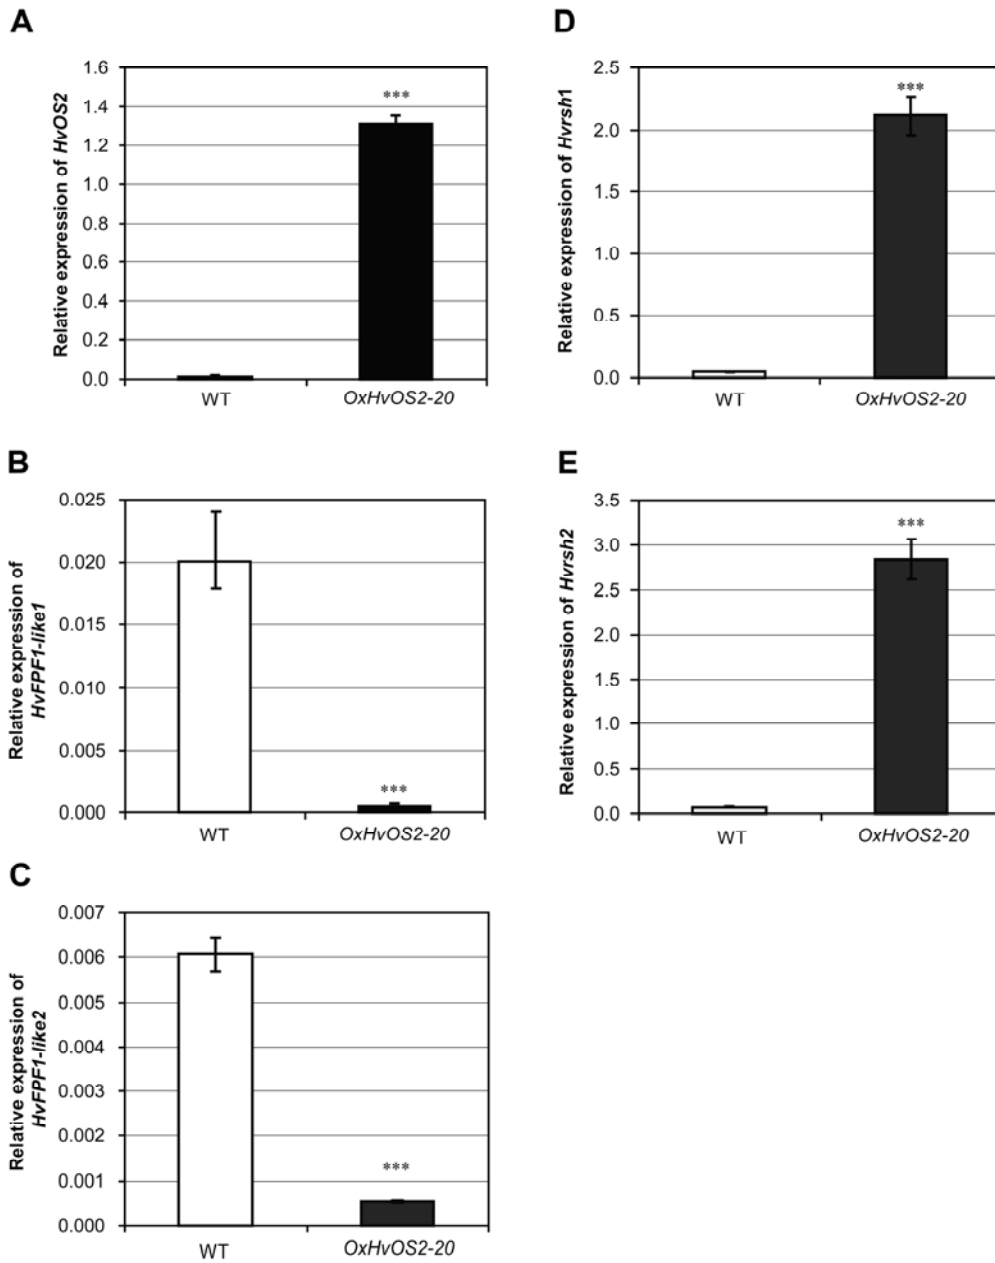

**Supplemental Figure S3.** Quantitative RT-PCR analysis of gene expression in *HvOS2* over-expression lines. Expression levels of candidate genes were assayed by qRT-PCR, in transgenic barley seedlings over expressing *HvOS2* (black) and compared to wildtype null (WT) siblings (white) at the 2<sup>nd</sup> leaf stage. Error bars show SE. Asterisks indicate P values of ANOVA: \*\*\*, P, < 0.001. (min. of 3 biological repeats). A, *HvOS2* (Contig12031). B, *HvFPF1-like1* (HU14G14r) C, *HvFPF1-like2* (Contig18182) D, *Hvrsh1* (Contig5185). E, *Hvrsh2* (Contig5058/9).

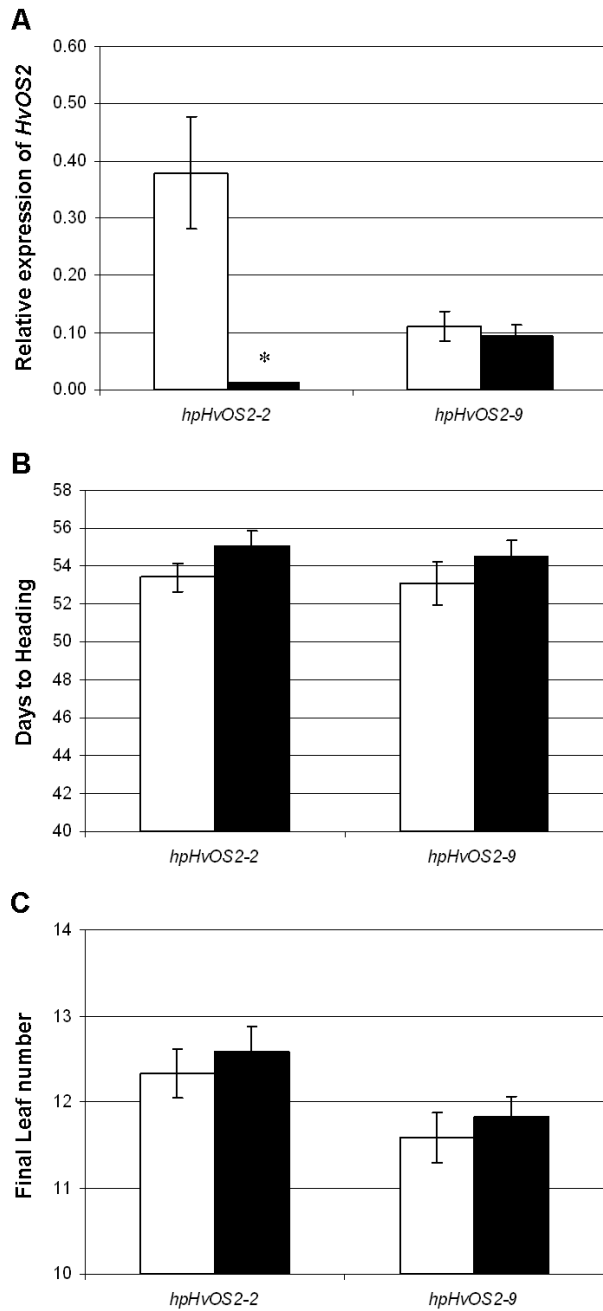

**Supplemental Figure S4.** Phenotypes and expression levels of *HvOS2* in RNAi transgenic plants. A, Expression of *HvOS2* in RNAi transgenic plants. Data is shown for two transgenic barley two independent lines transformed with gene-specific RNA interference (RNAi) constructs (black) versus wild-type null siblings (white). Expression was assayed by qRT-PCR and is shown relative to *ACTIN*. Error bars show SE. Asterisks indicate P values of ANOVA test: \*, P , < 0.05 (min. of 3 biological repeats). B, The average number of days until heading and C, final leaf number for transgenic plants (black) and wild-type siblings (white) Error bars show



SE. Heading date and final leaf number was calculated from 15 individual plants per genotype.

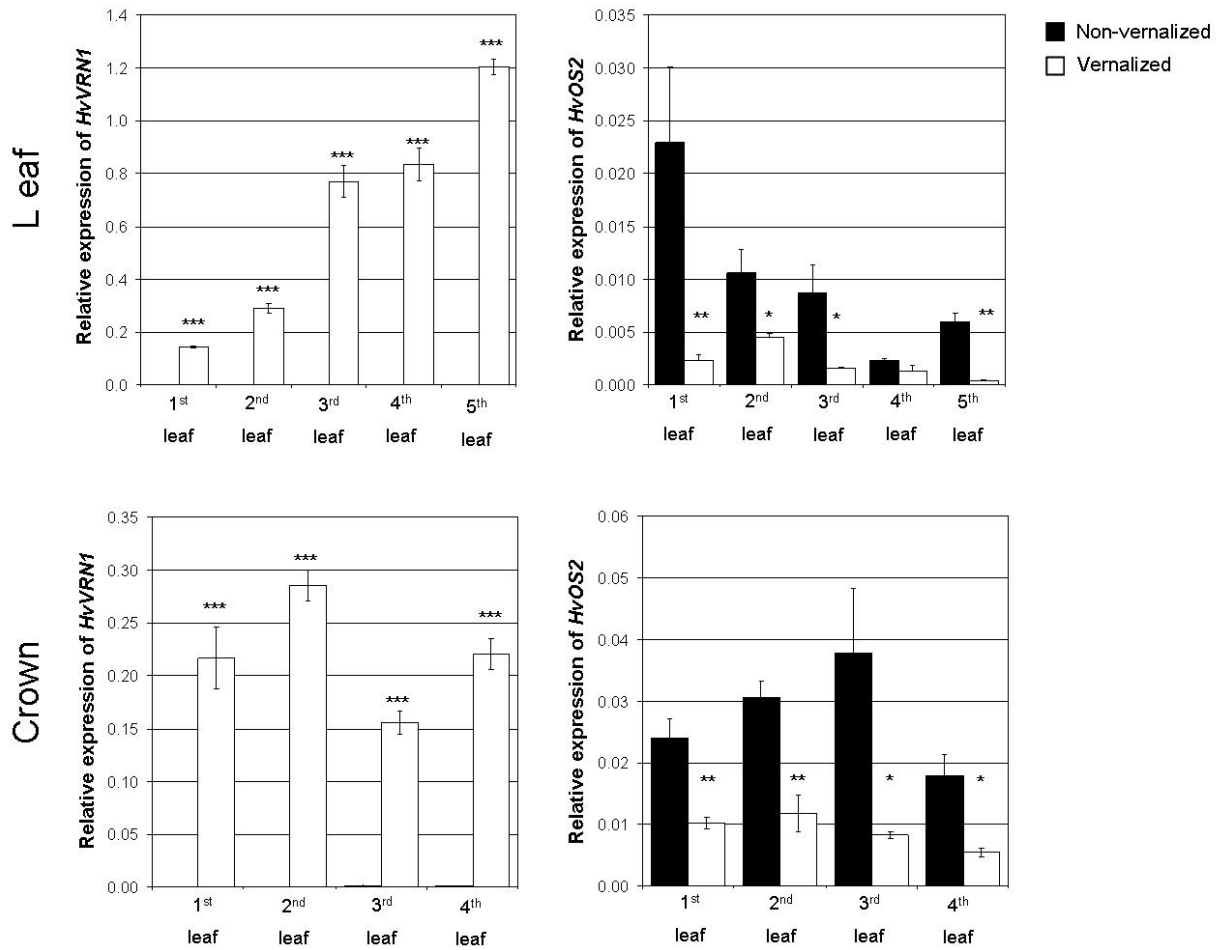

**Supplemental Figure S5.** Quantitative RT-PCR analysis of *HvOS2* gene expression during development in leaf and crown tissue. Relative expression levels of *HvVRN1* and *HvOS2* (white bars) in leaves and crown tissue from barley plants (cv. Sonja). The fully expanded leaf and crown tissue was taken from non-vernalized plants (black bars) and plants vernalized for 49 days (white bars) at the 1<sup>st</sup>, 2<sup>nd</sup>, 3<sup>rd</sup>, 4<sup>th</sup> and 5<sup>th</sup> leaf stage. Expression was assayed in non-vernalized (black bars) and plants vernalized for 49 days (white bars), and is shown relative to *ACTIN*. Error bars show SE from a minimum of 4 biological repeats. Asterisks indicate P values of ANOVA: \*, P, <0.05; \*\*, P, <0.01; \*\*\*, P, <0.001.

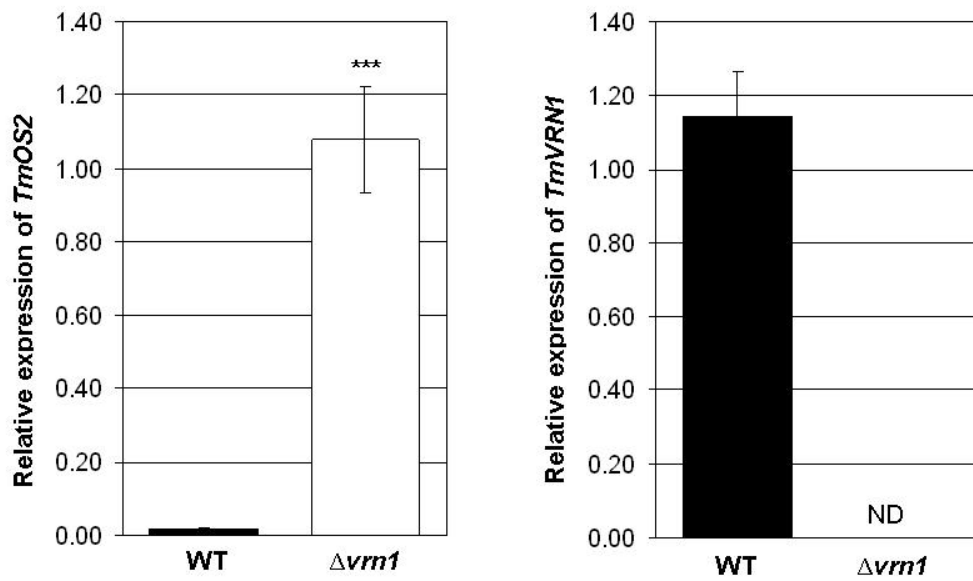

**Supplemental Figure S6.** Quantitative RT-PCR analysis of *TmOS2* gene expression in the  $\Delta VRN1$  mutant grown in long days. Relative expression levels of *TmOS2*-like (*TmAGL33*) in the *TmVRN1* deletion mutant ( $\Delta VRN1$ ) (white bars,  $n = 4$ ) versus the wild type parent strain (black bars,  $n = 5$ ). Expression was assayed in leaves from plants grown in long days, and shown relative to *ACTIN*. Error bars show SE. Asterisks indicate P values of ANOVA: \*\*\*,  $P < 0.001$ , ND, not detected.

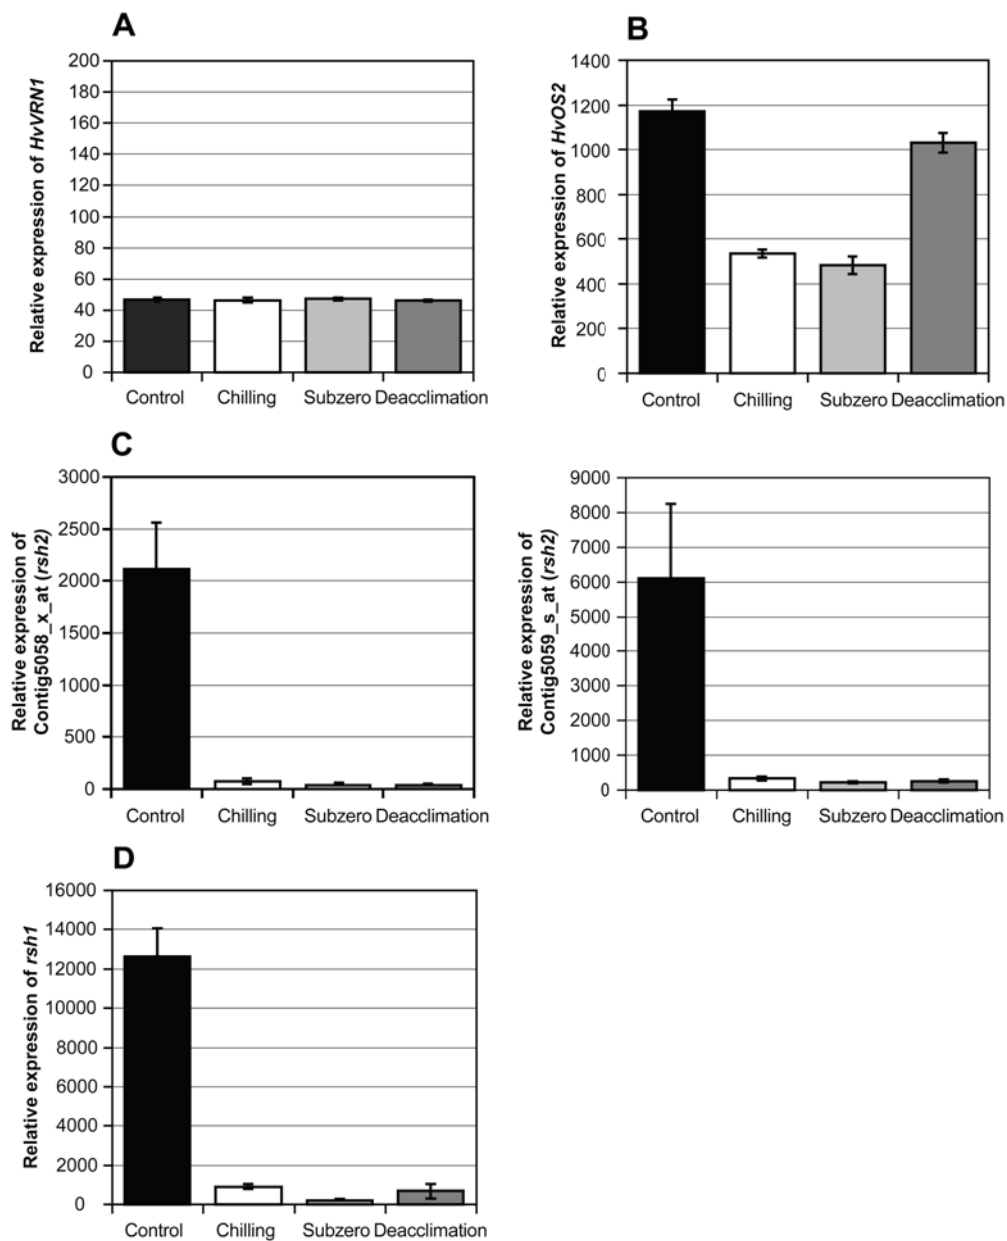

**Supplemental Figure S7.** Selected data from low temperature stress microarray experiment (cv. Dicktoo). Mean expression levels for A, *HvVRN1* B, *HvOS2* C, *Hvrsh2* and D, *Hvrsh1*. Error bars show standard error of 3 biological repeats. Data was sourced from the Plant Expression Database ([www.plexdb.org](http://www.plexdb.org)) Experiment Accession No. BB81.

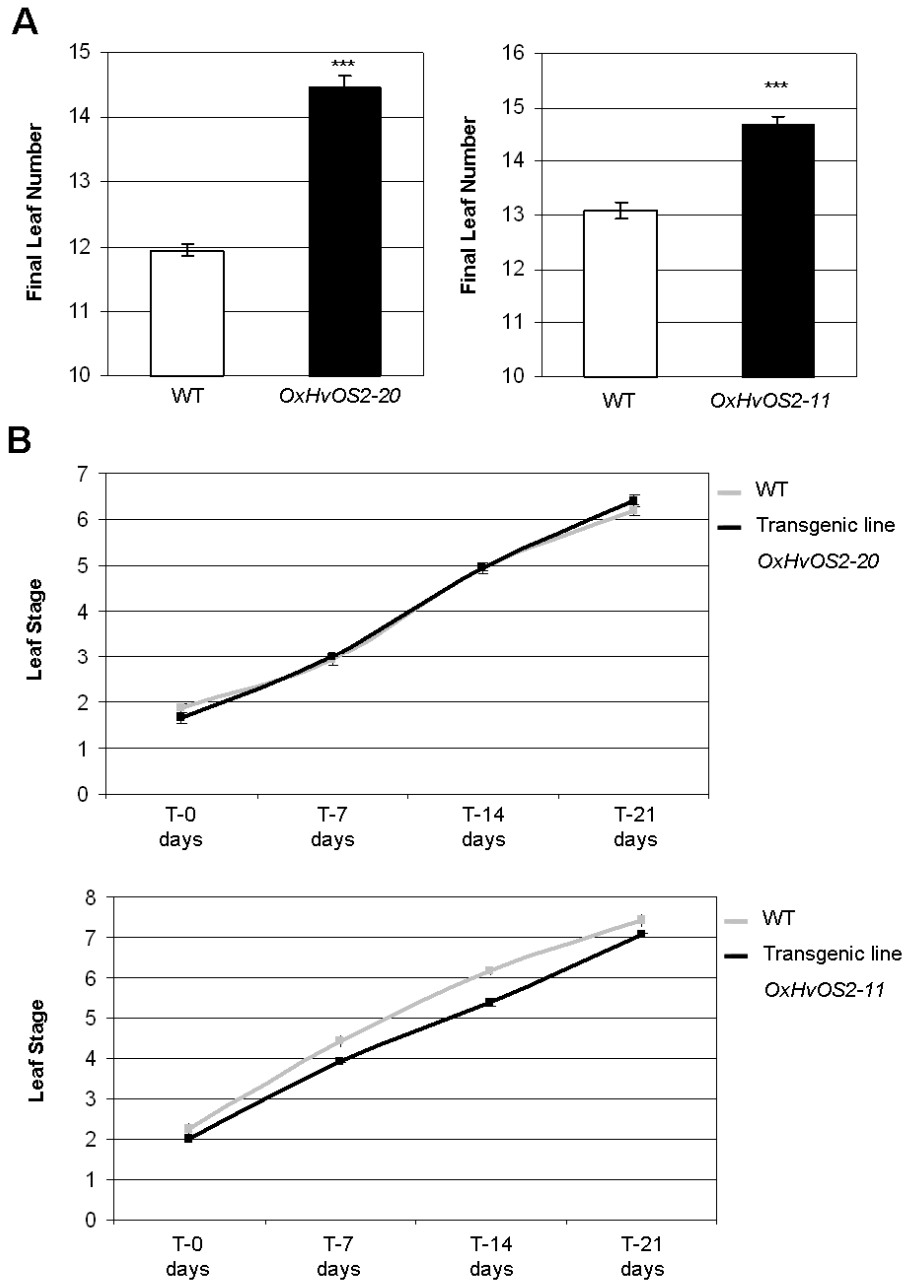

**Supplemental Figure S8.** Leaf appearance rate and final leaf number in *HvOS2* over-expression lines versus null sibling control lines. A, Final leaf number and B, leaf emergence rate for lines *OxHvOS2-20* and *OxHvOS2-11*. Leaf emergence rate was recorded 7, 14 and 21 days after the majority of plants reached the 2 leaf stage (T-0 days). Error bars show SE from a minimum of 12 biological repeats. Asterisks indicate P values of ANOVA: \*\*\*, P , <0.001.

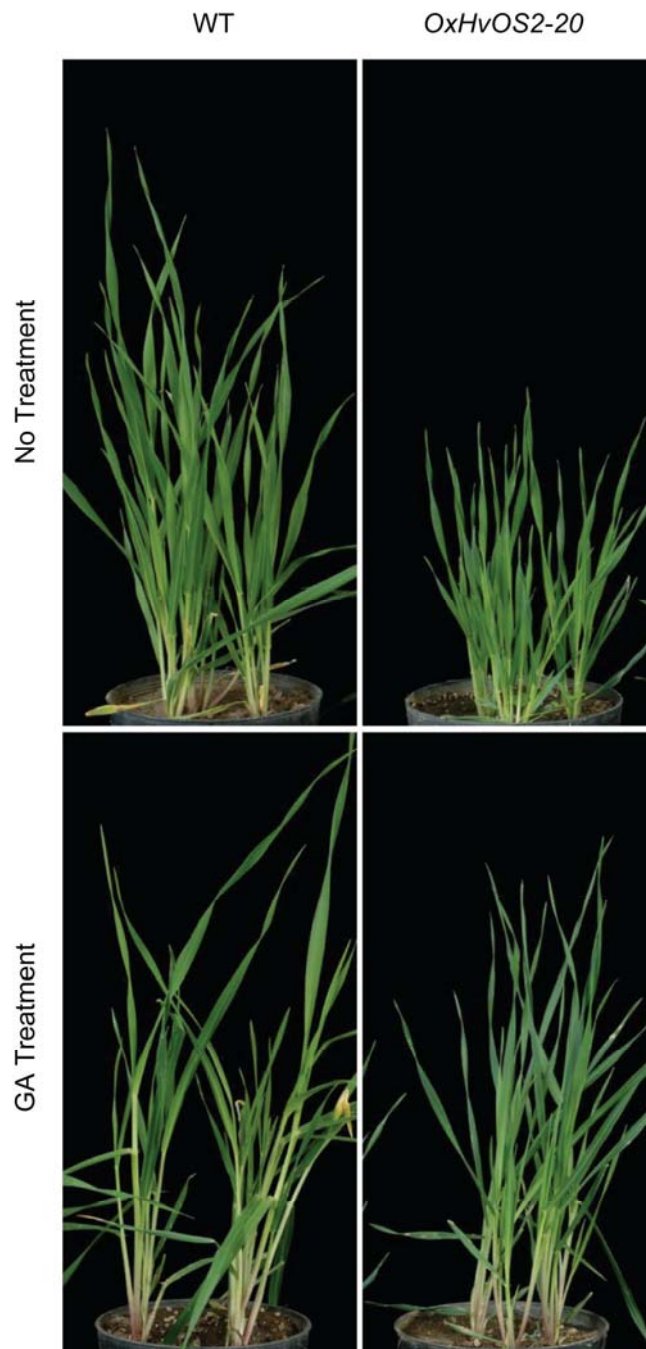

**Supplemental Figure S9.** Images of transgenic plants over-expressing *HvOS2* and wild-type siblings with or without GA treatment. A single application (10 $\mu$ L) of GA<sub>3</sub> (2.5 $\mu$ g/ $\mu$ L) in ethanol was applied to leaves.

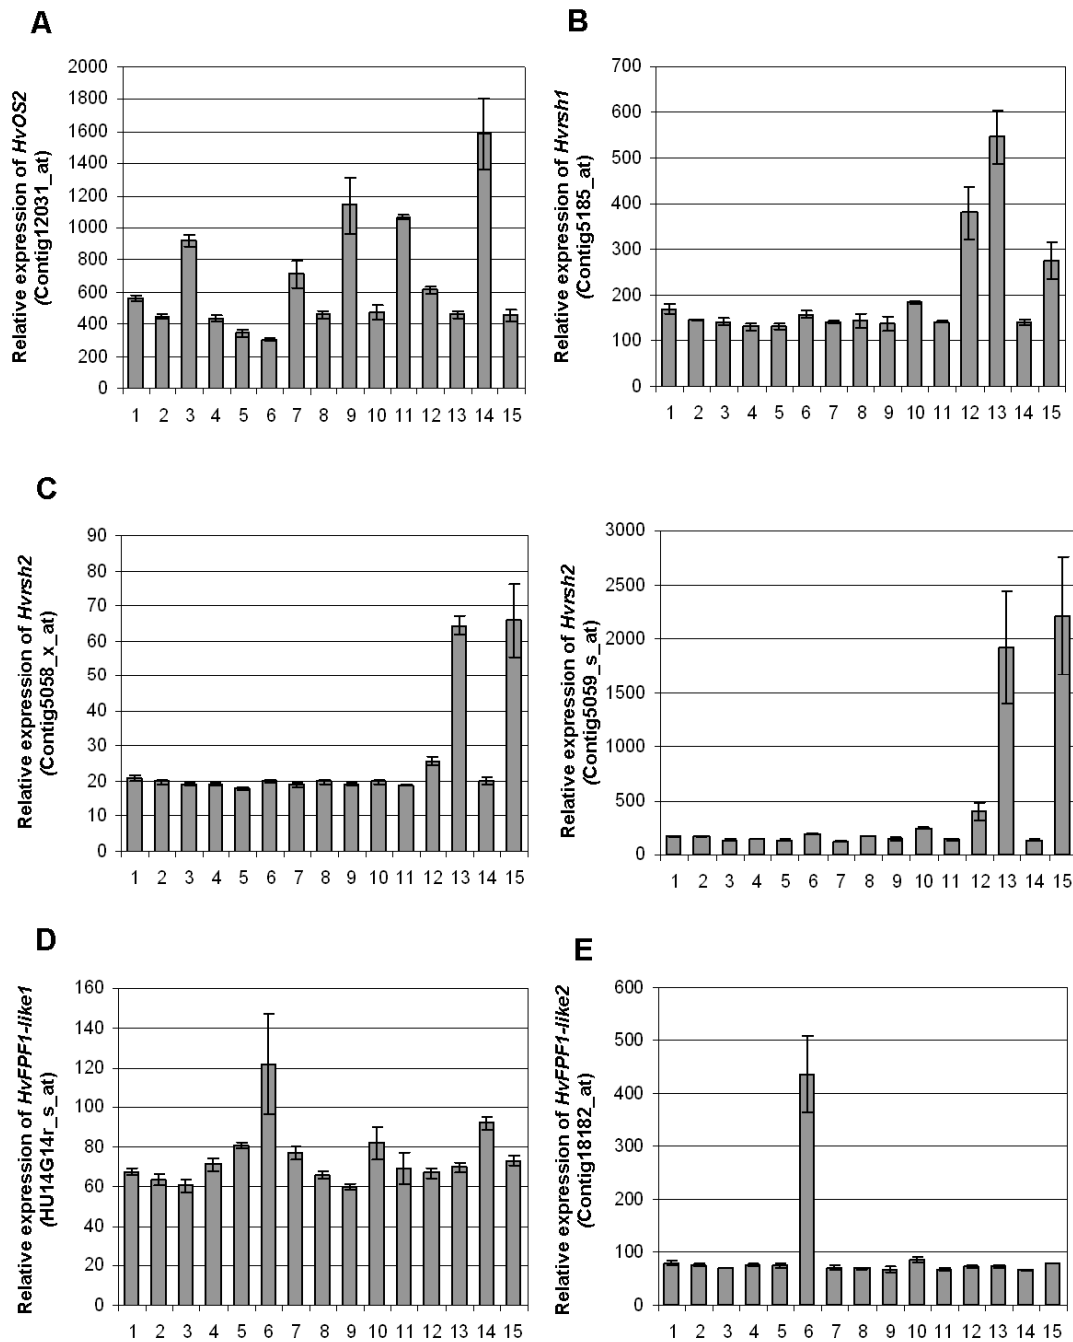

**Supplemental Figure S10.** Selected data from microarray analysis of gene expression during barley development (cv. Morex). Expression of *HvOS2* (A), *Hvrsh1* (B), *Hvrsh2* (C) *HvFPF1like-1* (D) and *HvFPF1like-2* (E). Treatments 1-15; 1) Germinating seed, coleoptyle. 2) Germinating seed, radicle. 3) Germinating seed, embryo. 4) Seedling, root. 5) Seedling, crown. 6) Seedling, leaf. 7) Immature, inflorescence. 8) Floral bracts, before anthesis. 9) Pistil, before anthesis. 10) Anthers,

before anthesis. 11) 5 DAP caryopsis. 12) 10 DAP caryopsis. 13) 16 DAP caryopsis. 14) 22 DAP embryo. 15) 22 DAP endosperm. Error bars show standard error of 3 biological repeats. Data was sourced from the Plant Expression Database ([www.plexdb.org](http://www.plexdb.org)) Experiment Accession No. BB3.



**Supplemental Table S1.** Best Arabidopsis matches for HvOS1 and HvOS2

| Protein Description            | Accession | Identity     | BLAST Score | E-value |
|--------------------------------|-----------|--------------|-------------|---------|
| <b>HvOS1</b>                   |           |              |             |         |
| AGAMOUS-LIKE 19 (AGL19)        | NP_194026 | 57/124 (45%) | 108         | 3e-24   |
| AGAMOUS-LIKE 14 (AGL14)        | NP_192925 | 58/125 (46%) | 107         | 8e-24   |
| AGAMOUS-LIKE 20 (AGL20 / SOC1) | NP_182090 | 56/142 (39%) | 105         | 2e-23   |
| <b>HvOS2</b>                   |           |              |             |         |
| AGAMOUS-LIKE 79 (AGL79)        | NP_189645 | 70/143 (48%) | 114         | 5e-26   |
| AGAMOUS-LIKE 20 (AGL20 / SOC1) | NP_182090 | 46/67 (68%)  | 107         | 5e-24   |
| AGAMOUS-LIKE 14 (AGL14)        | NP_192925 | 63/140 (45%) | 107         | 8e-24   |

**Supplemental Table S2.** Non -redundant blastn results for *HvOS1* and *HvOS2*

| Description                | Accession    | Organism          | Identity      | BLAST Score | E-value |
|----------------------------|--------------|-------------------|---------------|-------------|---------|
| <b><i>HvOS1</i></b>        |              |                   |               |             |         |
| <i>TaAGL42</i>             | DQ512358     | <i>T.aestivum</i> | 95% (479/503) | 793         | 0.0     |
| <i>TaAGL33</i>             | DQ512366     | <i>T.aestivum</i> | 86% (382/444) | 464         | 2e-127  |
| <i>TaAGL41</i>             | DQ512357     | <i>T.aestivum</i> | 83% (407/487) | 438         | 1e-119  |
| <i>OsMADS51</i>            | NM_001051770 | <i>O. sativa</i>  | 79% (395/497) | 324         | 3e-85   |
| Hypothetical protein, mRNA | XM_002456815 | <i>S. bicolor</i> | 91% (206/225) | 307         | 3e-80   |
| <b><i>HvOS2</i></b>        |              |                   |               |             |         |
| <i>TaAGL33</i>             | DQ512366     | <i>T.aestivum</i> | 95% (449/471) | 747         | 0.0     |
| <i>TaAGL41</i>             | DQ512357     | <i>T.aestivum</i> | 89% (424/472) | 599         | 5e-168  |
| <i>TaAGL42</i>             | DQ512358     | <i>T.aestivum</i> | 84% (389/458) | 448         | 2e-122  |
| Hypothetical protein, mRNA | XM_002456815 | <i>S. bicolor</i> | 82% (356/429) | 372         | 1e-99   |
| Hypothetical protein, mRNA | NP_001140218 | <i>Z.mays</i>     | 82% (353/430) | 350         | 5e-93   |

**Supplemental Table S3.** Differentially expressed genes between plants over-expressing HvOS2 and wild-type siblings - See Excel File

| <b>Supplemental Table S4. Primers</b> |                        |                               |
|---------------------------------------|------------------------|-------------------------------|
|                                       | <b>Forward</b>         | <b>Reverse</b>                |
| <b>qRT-PCR primers</b>                |                        |                               |
| <i>VRN1</i>                           | GGAAACTGAAGGCGAAGGTTGA | TGGTTCTTCCTGGCTCTGATATGTT     |
| <i>HvOS1</i>                          | TTGCGGTTCCCTGGAAGGACC  | AACTACTGGCATCTGAGTTGTC        |
| <i>HvOS2</i>                          | CAATGCTGATGACTCAGATGCT | CGCTATTTGTTGCGCCAAT           |
| <i>TmOS2</i>                          | CAATGCTGATGACTCAGATGCT | TCGTTGCGCCAACATCTTCT          |
| <i>HvFPF1-like1</i>                   | GTCAAGAACCGCGACCACTT   | CACATGCATAATCGCACACG          |
| <i>HvFPF1-like2</i>                   | CGTCGACCTCATCTCCCTTC   | AGTTGATTTGGGGCAGCTTG          |
| <i>rsh1</i>                           | TGGGAATCAGCGGTCTAAGG   | CTTTGGAAACGAGGCGAGAG          |
| <i>rsh2</i>                           | GGCATCAACCCGGACTACAG   | AAGGTCTTGCCGTCCTTGTC          |
|                                       |                        |                               |
| <b>ChIP primers</b>                   |                        |                               |
| <i>HvOS2</i>                          | CCCATCTCTGCACTCCCTG    | GGAAAGCTAGCCTCCTCCTCCTCCTCCGG |
|                                       |                        |                               |
| <b><i>TmVRN1</i> genotyping</b>       |                        |                               |
|                                       | CTGAAACATATCAGATCCAGG  | AACTTTATTCTCCTCCTGCAG         |
|                                       |                        | AATGGATTTCGTGCATAAGTTGG       |
